# Supplementary material
Source: HighWire-hosted journal article supplement (https://www.g3journal.org/content/suppl/2014/04/02/g3.114.011205)
Supplement: FigureS1.pdf [file FigureS1.pdf]

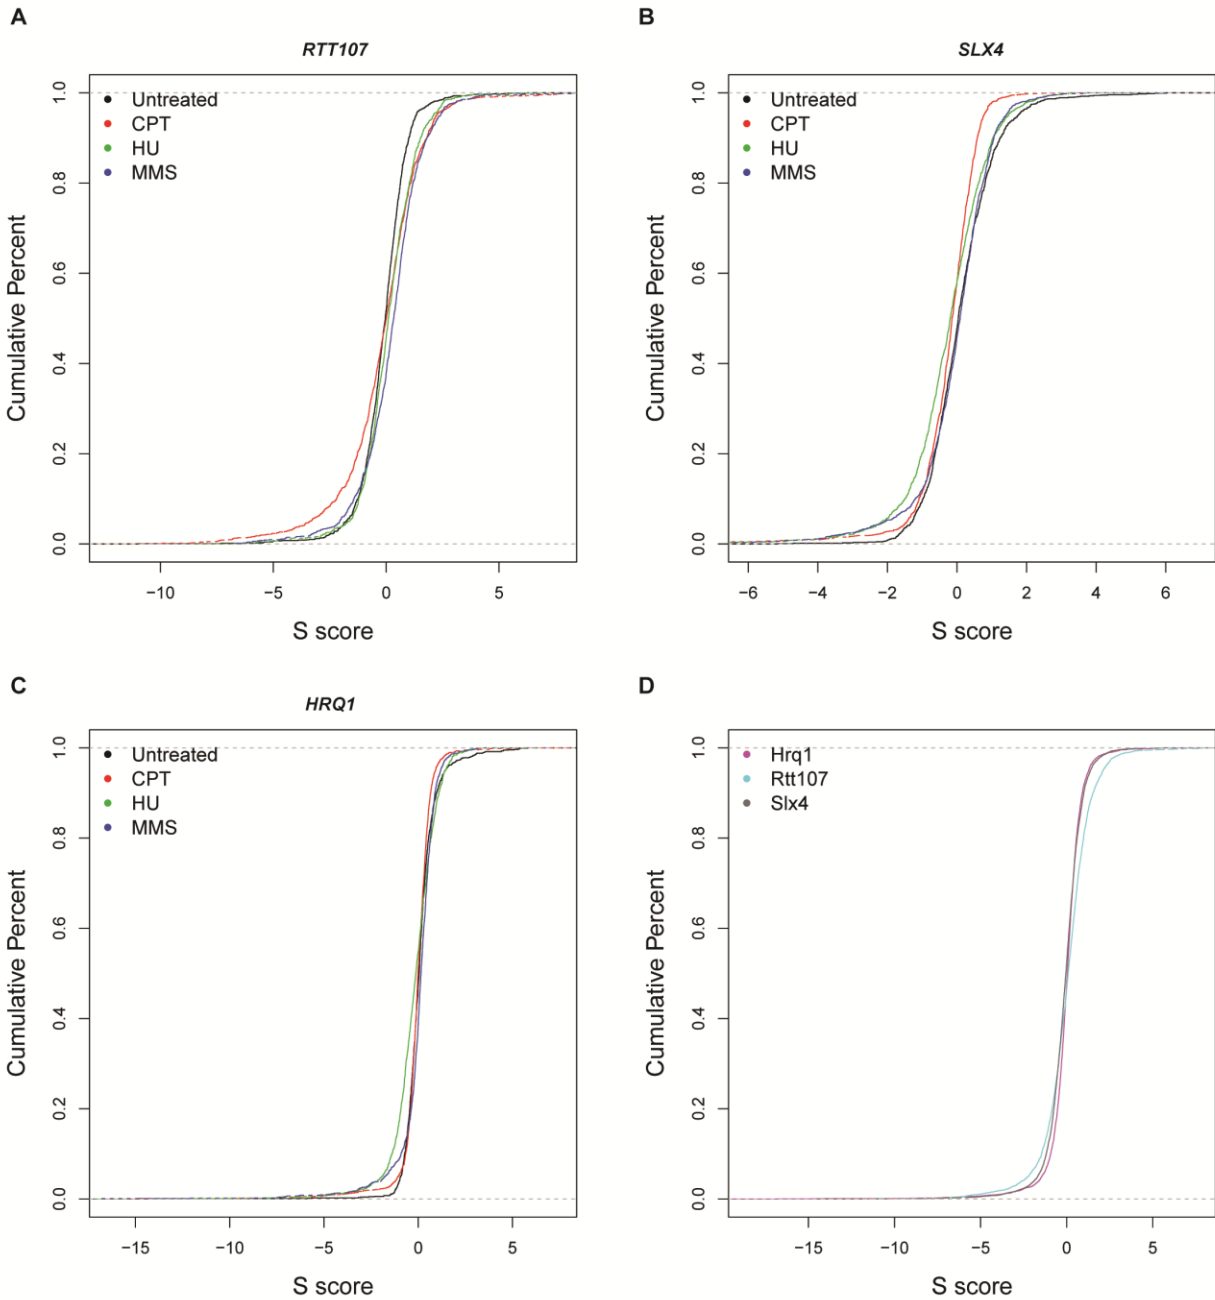

**Figure S1. Distribution of S-scores differed between conditions or between query genes, as shown by cumulative probability plots.** (A) S-scores for *RTT107*. Kolmogorov-Smirnov test, two-sided, p-values for untreated vs CPT =  $6.4\text{e-}09$ , untreated vs HU =  $1.4\text{e-}07$ , untreated vs MMS <  $2.2\text{e-}16$ . (B) S-scores for *SLX4*. Kolmogorov-Smirnov test, two-sided, p-values for untreated vs CPT =  $5.6\text{e-}16$ , untreated vs HU =  $4.9\text{e-}10$ , untreated vs MMS = 0.14. (C) S-scores for *HRQ1*. Kolmogorov-Smirnov test, two-sided, p-values for untreated vs CPT =  $2.5\text{e-}03$ , untreated vs HU <  $2.2\text{e-}16$ , untreated vs MMS =  $7.0\text{e-}05$ . (D) Combined S-scores for all conditions for each query gene. Kolmogorov-Smirnov test, two-sided, p-values for *RTT107* vs *HRQ1* <  $2.2\text{e-}16$ , *RTT107* vs *SLX4* <  $2.2\text{e-}16$ , *HRQ1* vs *SLX4* =  $7.8\text{e-}16$ .
